# Supplementary material for: Role of SUMO activating enzyme in cancer stem cell maintenance and self-renewal
Source: PubMed Central journal article supplement (PMC4974481; doi:10.1038/ncomms12326), 2016-07-28
Supplement: ncomms12326-s1.pdf [file ncomms12326-s1.pdf]

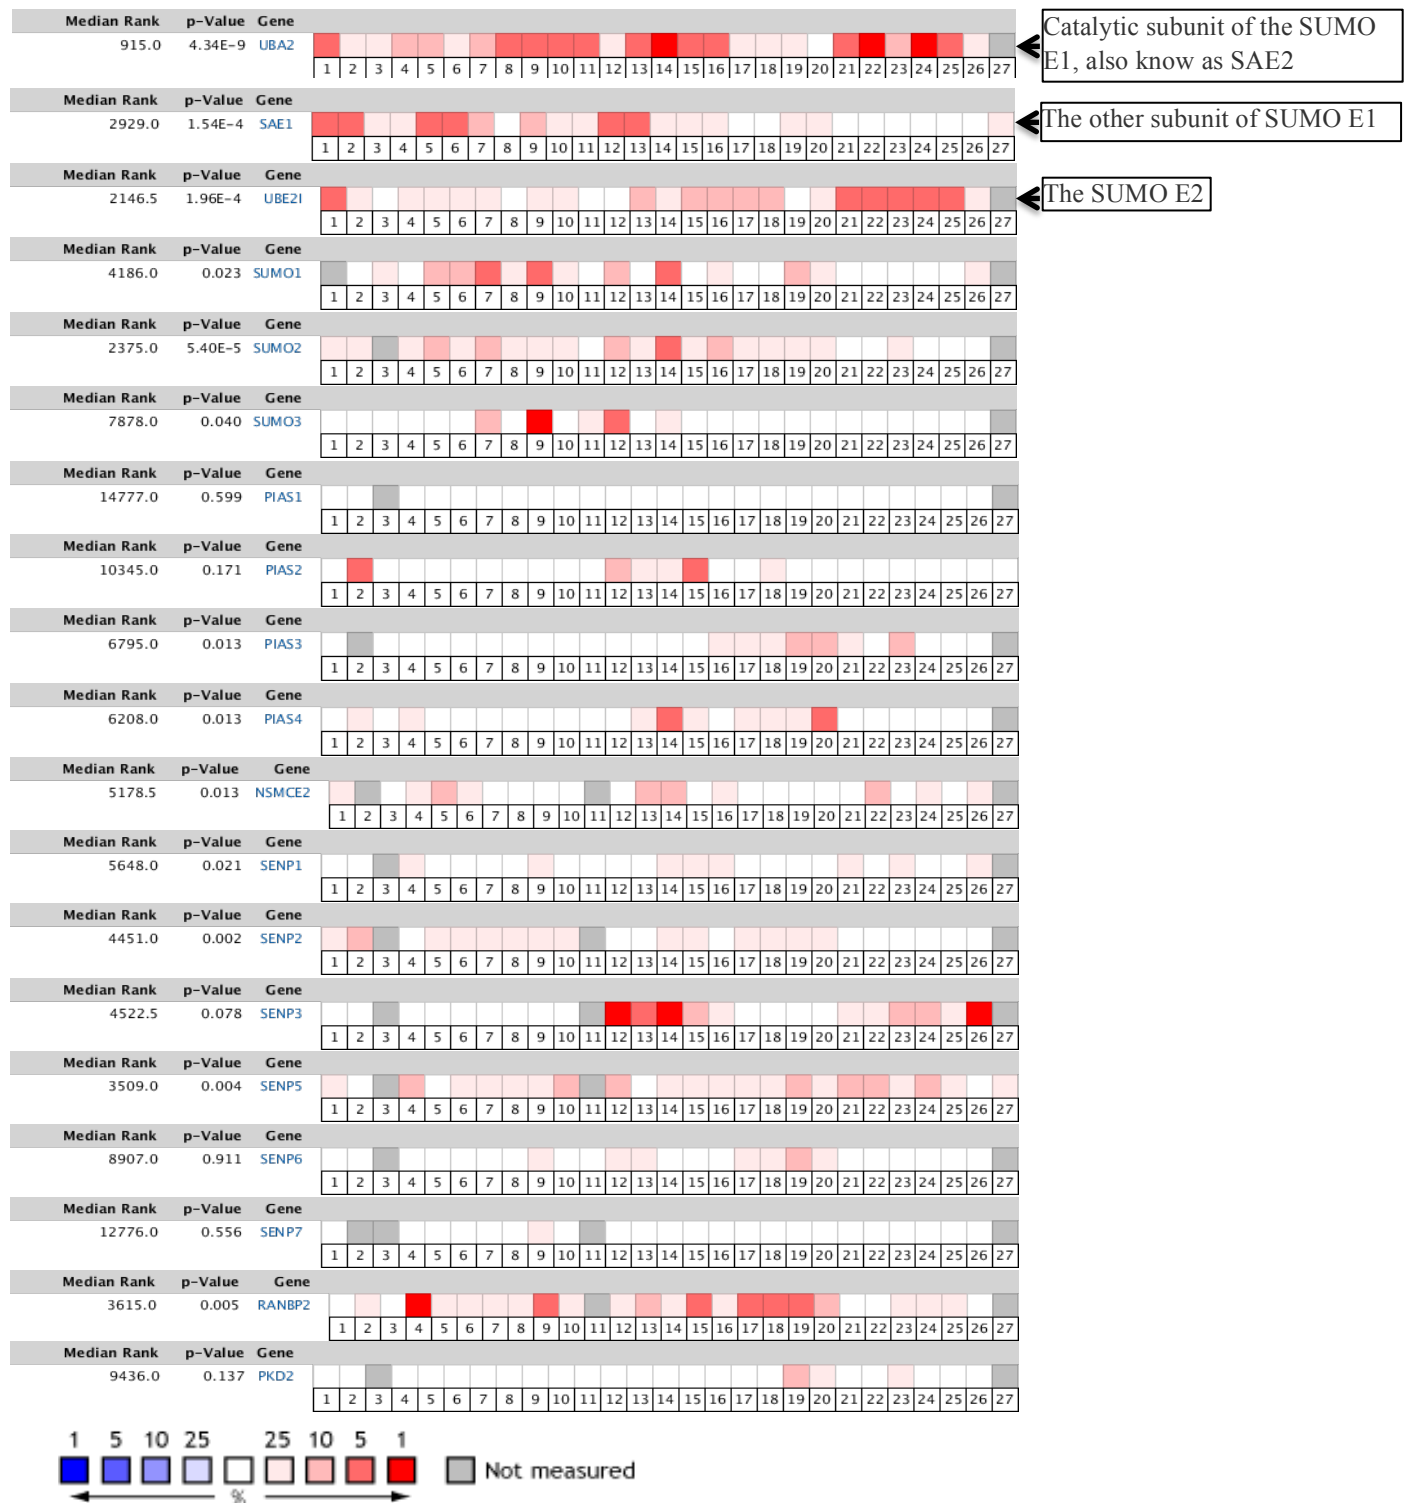

**Supplementary Figure 1. Expression of SUMOylation-related genes in colorectal cancer tumor tissues.** Genes involved in SUMO modifications were analyzed for in 27 independent datasets of gene expression profiles of colorectal cancer tissues available in Oncomine. The UBA2 (SAE2) gene is consistently among the most overexpressed genes (top 1-10%) across the

27 independent datasets. Red color indicates higher expression and blue color indicates lower expression in cancer tissues than in normal tissues. The 27 datasets are:

1. Rectal Adenocarcinoma vs. Normal *Gaedcke Colorectal*, *Genes Chromosomes Cancer*, 2010
2. Colorectal Adenoma Epithelia vs. Normal *Gaspar Colon*, *Am J Pathol*, 2008
3. Colorectal Carcinoma vs. Normal *Graudens Colon*, *Genome Biol*, 2006
4. Colorectal Carcinoma vs. Normal *Hong Colorectal*, *Clin Exp Metastasis*, 2010
5. Cecum Adenocarcinoma vs. Normal *Kaiser Colon*, *Genome Biol*, 2007
6. Colon Adenocarcinoma vs. Normal *Kaiser Colon*, *Genome Biol*, 2007
7. Colon Mucinous Adenocarcinoma vs. Normal *Kaiser Colon*, *Genome Biol*, 2007
8. Rectal Adenocarcinoma vs. Normal *Kaiser Colon*, *Genome Biol*, 2007
9. Rectal Mucinous Adenocarcinoma vs. Normal *Kaiser Colon*, *Genome Biol*, 2007
10. Rectosigmoid Adenocarcinoma vs. Normal *Kaiser Colon*, *Genome Biol*, 2007
11. Colon Adenocarcinoma vs. Normal *Ki Colon*, *Int J Cancer*, 2007
12. Skin Squamous Cell Carcinoma vs. Normal *Riker Melanoma*, *BMC Med Genomics*, 2008
13. Colon Adenoma vs. Normal *Sabates-Bellver Colon*, *Mol Cancer Res*, 2007
14. Rectal Adenoma vs. Normal *Sabates-Bellver Colon*, *Mol Cancer Res*, 2007
15. Colorectal Adenocarcinoma vs. Normal *Skrzypczak Colorectal*, *PLoS One*, 2010
16. Colorectal Carcinoma vs. Normal *Skrzypczak Colorectal*, *PLoS One*, 2010
17. Colon Adenoma Epithelia vs. Normal *Skrzypczak Colorectal 2*, *PLoS One*, 2010
18. Colon Adenoma vs. Normal *Skrzypczak Colorectal 2*, *PLoS One*, 2010
19. Colon Carcinoma Epithelia vs. Normal *Skrzypczak Colorectal 2*, *PLoS One*, 2010
20. Colon Carcinoma vs. Normal *Skrzypczak Colorectal 2*, *PLoS One*, 2010
21. Cecum Adenocarcinoma vs. Normal *TCGA Colorectal*, *No Associated Paper*, 2011
22. Colon Adenocarcinoma vs. Normal *TCGA Colorectal*, *No Associated Paper*, 2011
23. Colon Mucinous Adenocarcinoma vs. Normal *TCGA Colorectal*, *No Associated Paper*, 2011

24. Rectal Adenocarcinoma vs. Normal *TCGA Colorectal, No Associated Paper, 2011*
25. Rectal Mucinous Adenocarcinoma vs. Normal *TCGA Colorectal, No Associated Paper, 2011*
26. Rectosigmoid Adenocarcinoma vs. Normal *TCGA Colorectal, No Associated Paper, 2011*
27. Colon Carcinoma vs. Normal *Zou Colon, Oncogene, 2002*

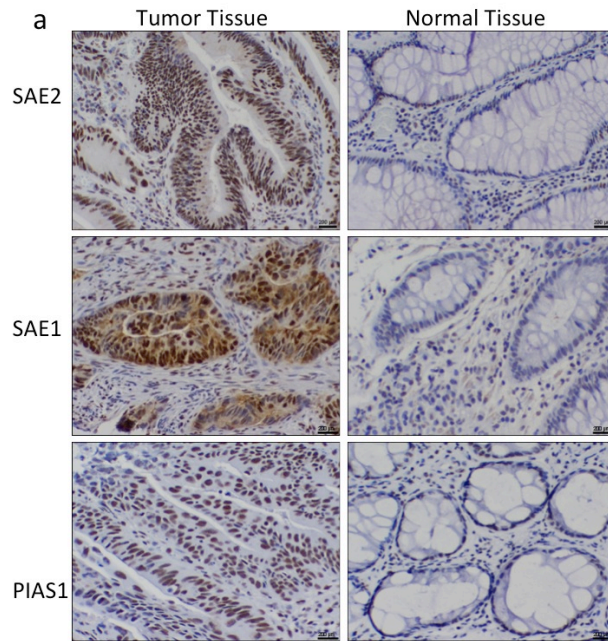

b

| Protein | Colorectal Cancer Tissue | Matched Normal Tissue |
|---------|--------------------------|-----------------------|
| SAE1    | 65%                      | 7%                    |
| SAE2    | 53%                      | 0%                    |
| PIAS1   | 10%                      | 0%                    |

**Supplementary Figure 2. IHC staining of colorectal cancer tissue and matched normal control with SAE2, SAE1 and PIAS1 antibodies.** (a) Representative IHC staining of SAE2 (top panel), SAE1 (middle panel) and PIAS1 (bottom panel) in colorectal cancer specimens (left panel) and matched normal tissues (right panel). Scale bar presents 200  $\mu$ m. (b) Statistical analysis of the percentage of tissue showing high protein levels from IHC staining results. Tumor specimens from 51 patients with colorectal cancer were examined for the expression of SAE2, SAE1 and PIAS1 in paired benign and malignant tissues by IHC staining. Percentage of tissues showing high IHC staining in 51 colorectal cancer specimens are shown.

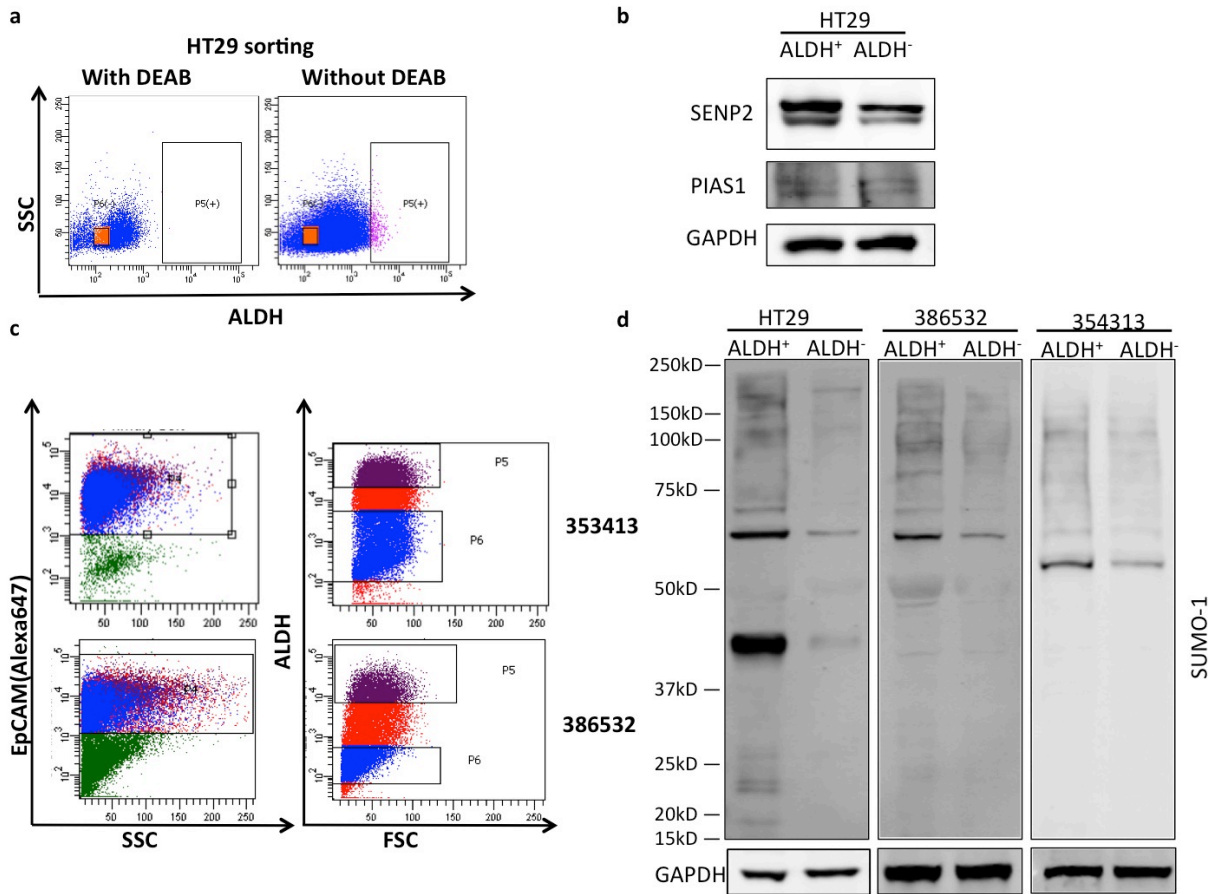

**Supplementary Figure 3. ALDH<sup>+</sup> human colorectal cancer cells have higher global SUMOylation levels.** (a) Representative Aldefluor sorting of HT-29 cells. Control samples incubated with the inhibitor, DEAB, were used to ensure identification of ALDH<sup>+</sup> (boxed region) and ALDH<sup>-</sup> cells. (b) Representative Western blot of SENP2, PIAS1 and GAPDH of ALDH<sup>+</sup> and ALDH<sup>-</sup> cells isolated from HT29. (c) Aldefluor and EpCAM sorting of PDX colorectal cancer primary cultures (354313 and 386532). EpCAM (Alexa-647) was used to isolate colorectal cancer cells from stroma or fibroblasts (EpCAM<sup>+</sup> cells labeled as P4), and ALDH<sup>+</sup> (P5) and ALDH<sup>-</sup> cells (P6) were sorted from EpCAM<sup>+</sup> population using Aldefluor assay kit. (d) Representative Western blot of SUMO-1 in ALDH<sup>+</sup> and ALDH<sup>-</sup> cells isolated from HT29 and primary PDX culture; GAPDH, loading control.

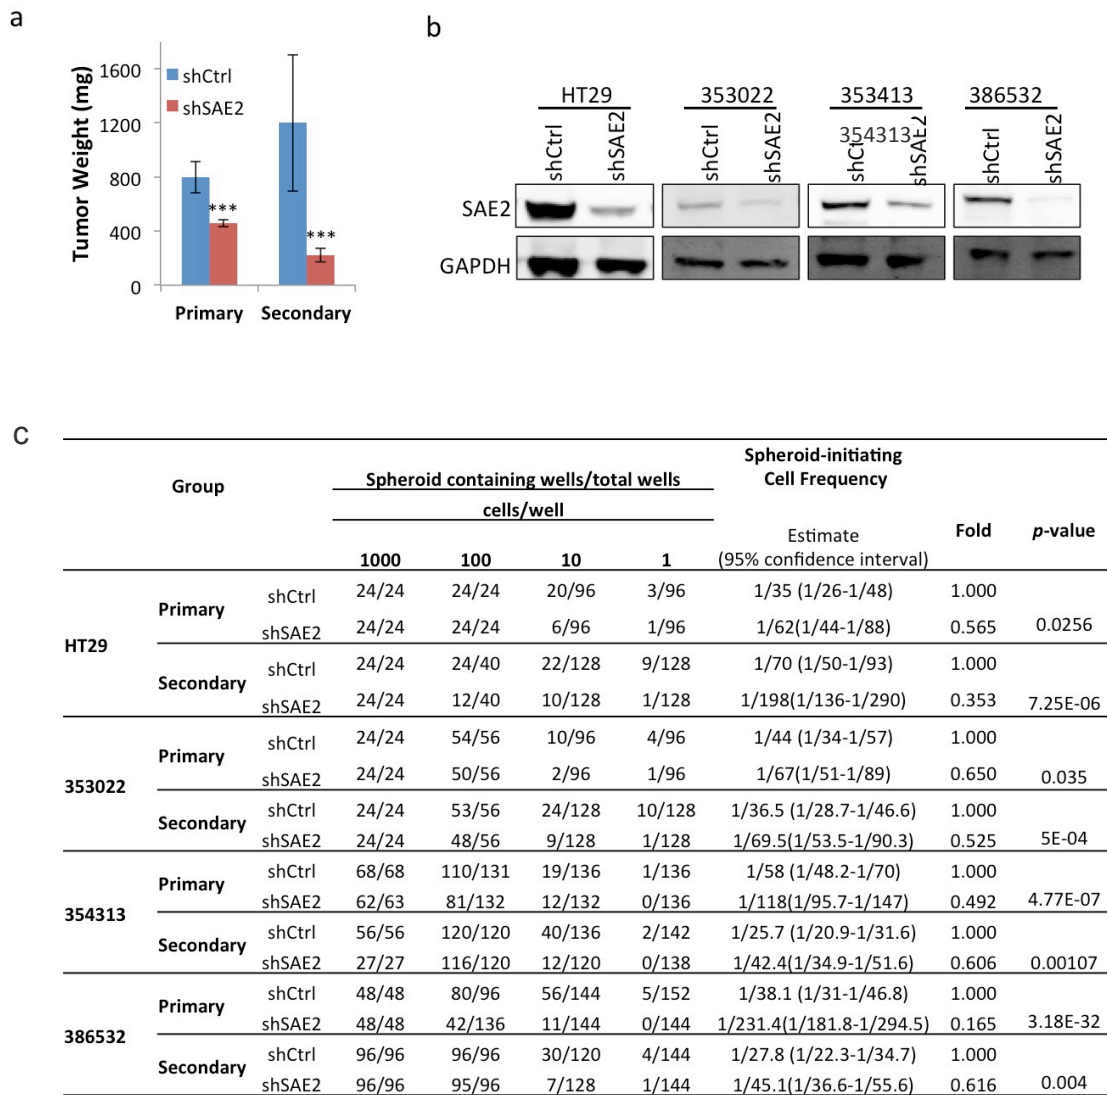

**Supplementary Figure 4. Additional supporting data for LDA of Fig. 2.** (a) Tumor weight of *in vivo* LDA of shCtrl and shSAE2 group implanted with 1,000 cells/mouse (corresponding to Fig. 2a and 2b). (b) Representative Western blot for SAE2 expression in HT29 cells or primary culture of colorectal PDX tissues 353022, 354313 and 386532 showing SAE2 knockdown; GAPDH, loading control. (c) Detailed data of *in vitro* LDA. HT29 and primary culture of colorectal cancer PDX (353022, 354313 and 386532) cells were transduced with control (shCtrl) or SAE2-targeting shRNA (shSAE2). Then the cells were dissociated after primary spheres were formed and the dissociated cells were plated for LDA. The percentage of wells with spheres was determined for primary and secondary LDA. CSC frequency (sphere formation cells) and *p*-values were calculated as described in Methods.

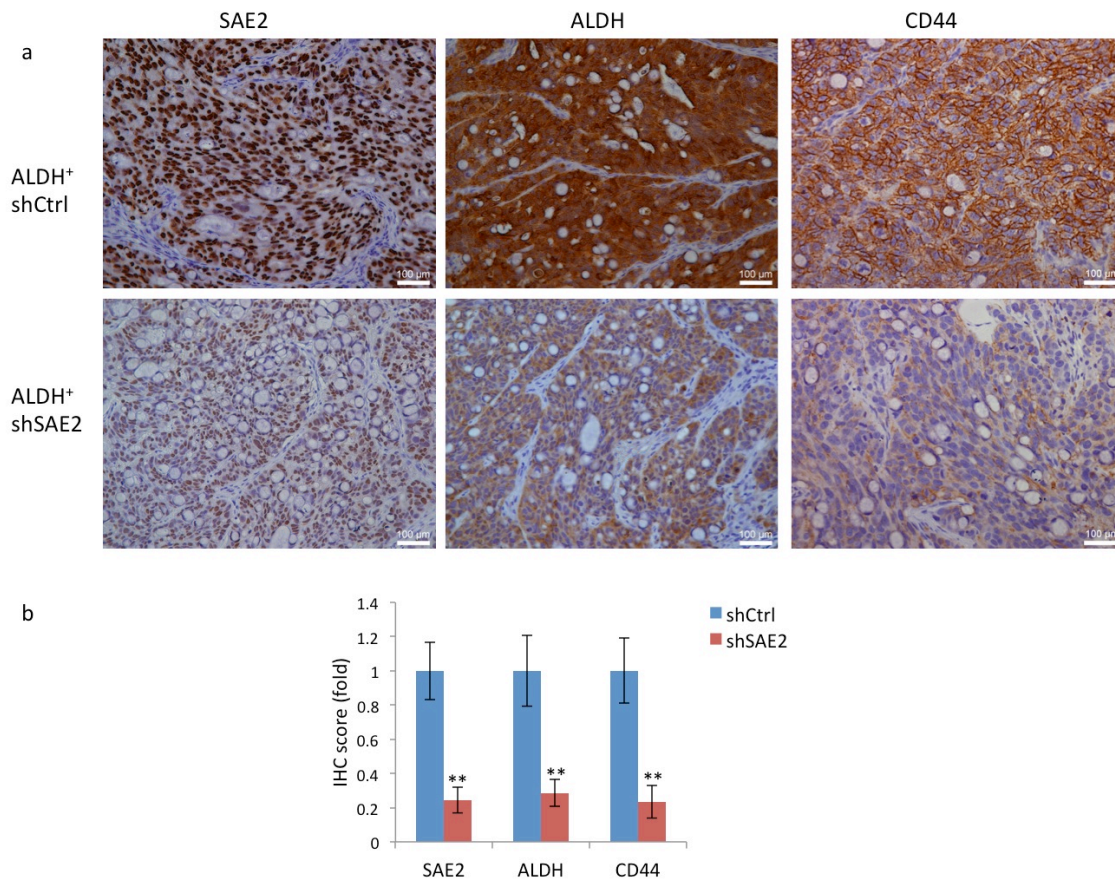

**Supplementary Figure 5. SAE2 knockdown in ALDH<sup>+</sup> cells reduced SAE2, ALDH1A1 and CD44 levels in xenograft tumor tissue.** (a) IHC staining of tumor tissues from *in vivo* LDA with or without SAE2 knockdown in HT29 ALDH<sup>+</sup> cells (Fig. 3). The scale bar represents 100 μm. (b) Statistical analysis of IHC staining. 10 slides of each group were scored for staining intensity (range from 0-no staining, 1-weak, 2-intermediate, 3-strong intensity) multiplied by the percentage of the staining area (0-100); range = 0-300. Two-tailed Student *t*-test was used to determine *p* values (\*\* *p* < 0.01).

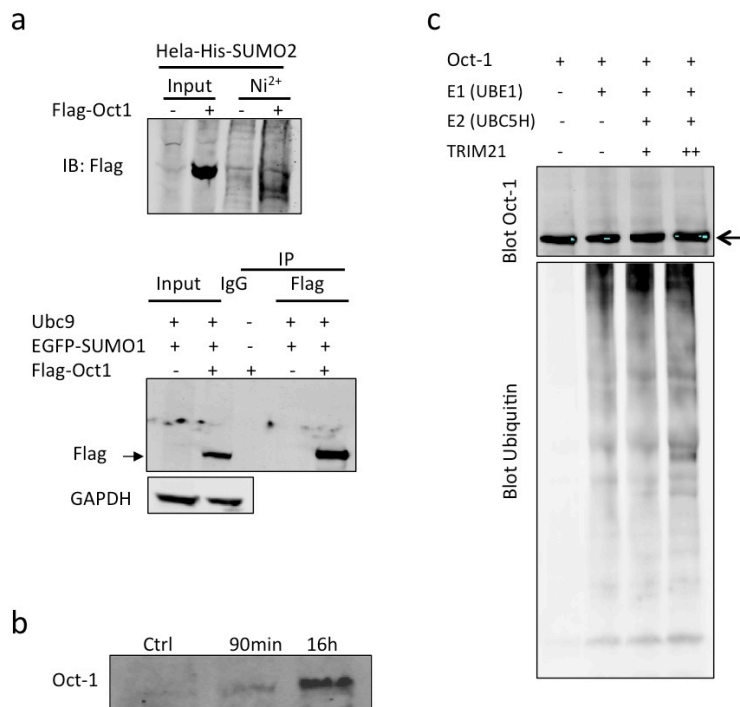

**Supplementary Figure 6. Oct-1 SUMOylation and ubiquitination assays.** (a) Upper panel, HeLa cells stably expressing His-SUMO2 were transfected with or without Flag-tagged Oct-1. After 2 days, cells were collected and SUMO-2 modified proteins were pull-down by Ni-NTA affinity chromatography under denaturing condition, followed by Western blotting with Flag antibody. No SUMOylated-Oct-1 band was detected. Lower panel, Flag-tagged Oct-1 was co-transfected with UBC9 and EGFP-SUMO1 in 293T cells. Cell lysate was immunoprecipitated and western blotted with Flag antibody. Only unmodified Oct-1 band was detected. (b) Representative blot of *in vitro* transcription and translation (IVTT) of Oct-1 using different incubation times. DNA encoding full-length Oct-1 was subcloned into pET28a vector. TNT T7 Quick System Kit (Promega) was used to perform IVTT with linearized pET28a-Oct-1. Oct-1 was detected by Western blot. Reaction mixture without linearized pET28a-Oct-1 was used as control “Ctrl”. (c) Representative blot of *in vitro* ubiquitination assay with IVTT Oct-1 by incubating with recombinant E1 (UBE1), E2 enzyme (UBCH5), and ubiquitin, and without or with 0.5 or 10  $\mu$ g TRIM21 protein (obtained from Creative-Biomart). Oct-1 and ubiquitin were detected by Western blot using anti-Oct-1 and anti-ubiquitin antibodies.

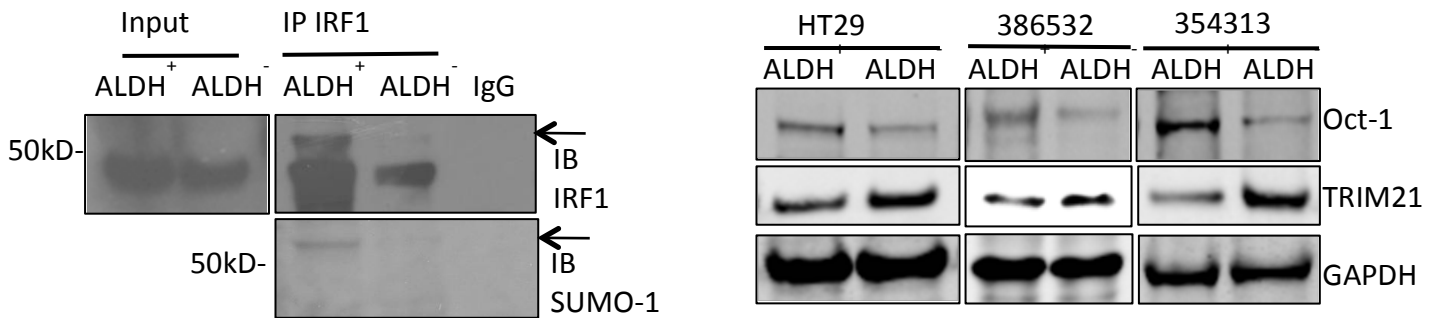

**Supplementary Figure 7. Additional data showing connection of SUMOylated IRF1, Oct1 and TRIM21.** (a) SUMOylated IRF1 was only present in HT29 ALDH<sup>+</sup> cells but not in ALDH<sup>-</sup> cells. HT29 ALDH<sup>+</sup> and ALDH<sup>-</sup> cell lysate were used for IP with anti-IRF1 antibody and protein G beads. Equal amount of ALDH<sup>+</sup> cell lysate was incubated with rabbit IgG as blank control. Clean-Blot IP detection kit was used for western blotting of IRF1 (upper panel) and SUMO-1 (bottom panel). SUMO-modified IRF1 was only observed in ALDH<sup>+</sup> lysates and is indicated by arrows. (b) ALDH<sup>+</sup> cells have higher Oct-1 level and lower TRIM21 level than ALDH<sup>-</sup> cells. Western blot shows Oct-1 and TRIM21 level of ALDH<sup>+</sup> and ALDH<sup>-</sup> cells isolated from colorectal cancer cell line HT29 and primary culture of colon cancer PDX tumor tissue (386532 and 354313 stands for PDX tissue from different patient specimen).



| Group     | Spheroid containing wells/total wells |       |       |         |        | Spheroid-initiating Cell Frequency    |                       |         |          |          |
|-----------|---------------------------------------|-------|-------|---------|--------|---------------------------------------|-----------------------|---------|----------|----------|
|           | cells/well                            |       |       |         |        | Estimate<br>(95% confidence interval) | Fold                  | p-value |          |          |
|           | 5000                                  | 1000  | 100   | 10      | 1      |                                       |                       | a       | b        |          |
| Primary   | shCtrl+EV                             | 64/64 | 80/80 | 128/128 | 32/128 | 2/136                                 | 1/28(1/23-1/34)       | 1.000   |          |          |
|           | shSAE2+EV                             | 64/64 | 88/88 | 114/128 | 7/128  | 0/128                                 | 1/57(1/48-1/69)       | 0.481   | 6.71E-07 |          |
|           | shSAE2+Oct-1                          | 64/64 | 88/88 | 106/112 | 23/120 | 1/136                                 | 1/39(1/32-1/48)       | 0.701   | 0.018    | 0.0105   |
| Secondary | shCtrl+EV                             | 48/48 | 96/96 | 119/120 | 27/120 | 2/96                                  | 1/29.8(1/24.2-1/36.7) | 1.000   |          |          |
|           | shSAE2+EV                             | 72/72 | 96/96 | 96/120  | 6/120  | 0/96                                  | 1/73(1/59.7-1/89.3)   | 0.408   | 2.70E-09 |          |
|           | shSAE2+Oct-1                          | 56/56 | 96/96 | 115/120 | 17/120 | 1/96                                  | 1/40(1/32.8-1/48.8)   | 0.745   | 0.0535   | 5.11E-05 |

**Supplementary Figure 8. Detailed data showing that overexpression of Oct-1 partially restored CSC population in HT29-shSAE2 cells.** Stable cell lines were generated with lentivirus expressing plentiCMV-hygro empty vector (EV) or Flag-Oct-1 in HT29 shCtrl and shSAE2 cells. Spheroid-formation assay was carried out with limited dilution series. CSC frequency and *p*-value were determined as described in Methods. **a**, *p*-value calculated by comparing shSAE2+Oct-1 and shSAE2+EV cells with shCtrl+EV; **b**, *p*-value calculated from comparison between shSAE2+EV and shSAE2+Oct-1 cells.

a

| Group     |          | Spheroid containing wells/total wells |         |        |        | Spheroid-initiating Cell Frequency    |      |          |
|-----------|----------|---------------------------------------|---------|--------|--------|---------------------------------------|------|----------|
|           |          | cells/well                            |         |        |        | Estimate<br>(95% confidence interval) | Fold | p-value  |
|           |          | 1000                                  | 100     | 10     | 1      |                                       |      |          |
| Primary   | shCtrl   | 72/72                                 | 96/96   | 38/104 | 6/112  | 1/20.5 (1/16.1-1/26.1)                | 1    |          |
|           | shUBC9#1 | 84/84                                 | 128/128 | 9/120  | 1/120  | 1/37.3(1/30.7-1/45.3)                 | 0.55 | 0.000344 |
|           | shUBC9#2 | 96/96                                 | 119/120 | 6/120  | 0/136  | 1/41.8(1/34.3-1/50.8)                 | 0.49 | 2.10E-05 |
| Secondary | shCtrl   | 72/72                                 | 96/96   | 52/104 | 12/112 | 1/13.8 (1/10.9-1/17.5)                | 1    |          |
|           | shUBC9#1 | 96/96                                 | 128/128 | 26/120 | 2/120  | 1/30.2(1/24.6-1/37)                   | 0.46 | 2.48E-06 |
|           | shUBC9#2 | 96/96                                 | 119/120 | 17/120 | 0/136  | 1/35.8(1/29.4-1/43.8)                 | 0.39 | 1.04E-08 |

b

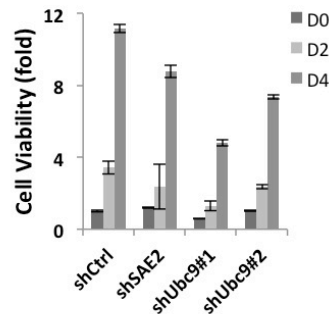

### Supplementary Figure 9. UBC9 knockdown also reduced CSC frequency and self-renewal

as determined by *in vitro* LDA as well as proliferation. (a) Stable Ubc9 knockdown cell lines were generated with two independent shRNAs (shUBC9#1 and shUBC9#2) by lentiviral transduction of HT29 cells. shCtrl, shUBC9#1 and shUBC9#2 cells were dissociated after primary spheres were formed and dissociated cells were plated for LDA. CSC frequency and *p*-values were calculated as described in Methods. (b) Knockdown of SAE2 or UBC9 also suppressed cell proliferation. Cell viability was measured for stable cell lines shCtrl, shSAE2, shUBC9#1 and shUBC9#2 on day 0 (D0), day 2 (D2) and day 4 (D4) after cell seeding using CellTiter-Glo (Promega, Inc). Results were normalized to shCtrl at D0.

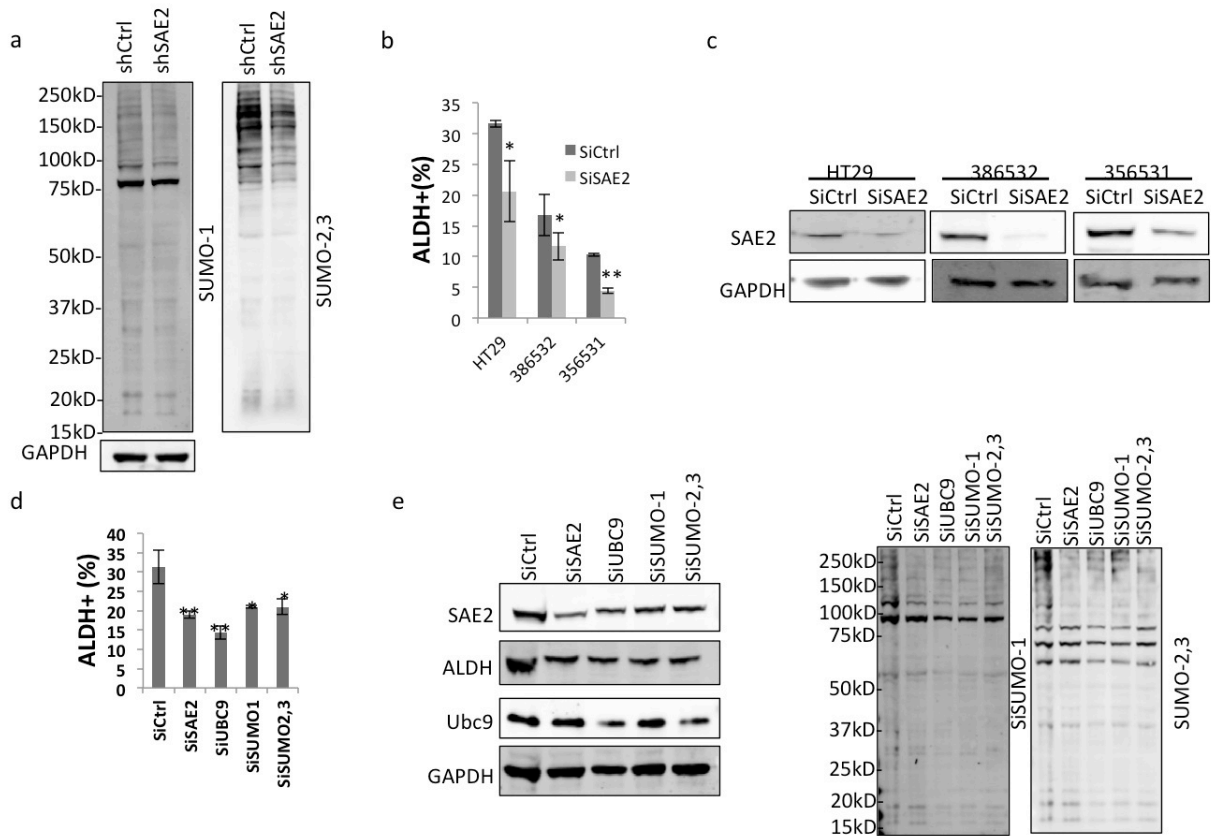

**Supplementary Figure 10. Inhibition of SUMOylation reduced colorectal cancer cell**

**ALDH<sup>+</sup> population.** (a) Representative Western Blot of global SUMOylation (SUMO-1 and

SUMO-2,3) in stable HT29 cell line expressing control non-silencing shRNA (shCtrl) or SAE2-

targeting shRNA (shSAE2); GAPDH, loading control. (b) Transient knockdown of SAE2 with

siRNA transfection reduced ALDH<sup>+</sup> population in HT29 and primary colorectal cancer PDX

cultures (386532 and 356531) as determined by FACS Aldefluor assay. Three independent

knockdown experiments were performed and results were analyzed with two-tailed Student's *t*-

test. (c) Representative Western blot of SAE2 expression of samples in (b); GAPDH, loading

control. (d) Transient knockdown of SAE2, UBC9, SUMO-1 or SUMO-2,3 with siRNA

transfection reduced ALDH<sup>+</sup> population in HT29 cells as determined by FACS Aldefluor assay.

(e) Representative Western blot of SAE2, ALDH, UBC9, SUMO-1 and SUMO-2,3 of samples in

(d) ; GAPDH, loading control. (\*  $p < 0.05$ , \*\*  $p < 0.01$ )

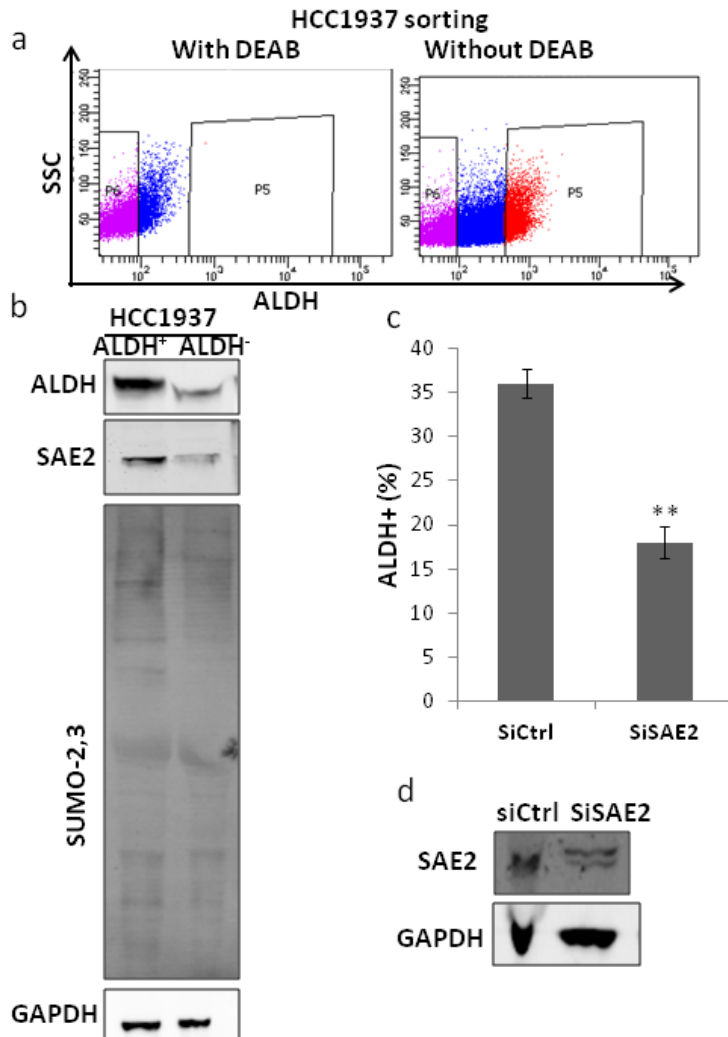

**Supplementary Figure 11. ALDH<sup>+</sup> cells isolated from the breast cancer cell line HCC1937 also have higher SAE2 and global SUMOylation levels.** (a) Representative Aldefluor sorting of HCC1937 cells. Control samples incubated with the inhibitor, DEAB, were used to ensure the identification of ALDH<sup>+</sup> (boxed region P5) and ALDH<sup>-</sup> cells (boxed region P4). (b) Representative Western blot of ALDH, SAE2, and SUMO-2,3 of ALDH<sup>+</sup> and ALDH<sup>-</sup> isolated from HCC1937 cells; GAPDH, loading control. (c) Knockdown of SAE2 reduced ALDH<sup>+</sup> population in HCC1937 cells (\*\*,  $p < 0.01$ ). (d) Western blot of SAE2 of the FACS samples shown in (c).

**Supplementary Figure 12. All original blots in main figures.**

Fig.1d

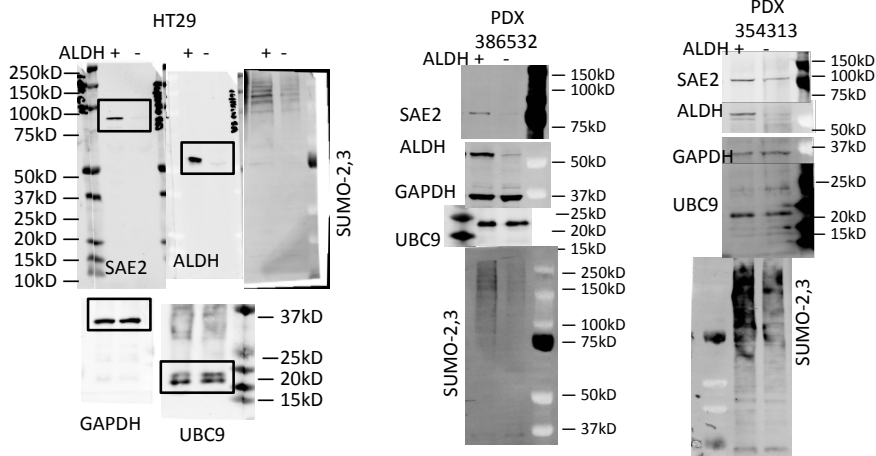

Fig. 4a

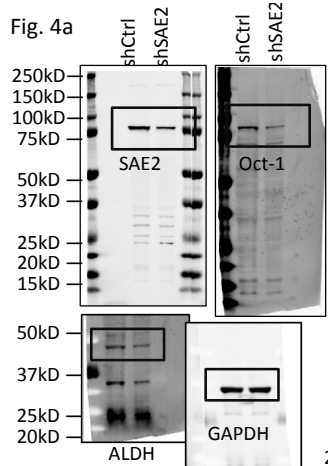

Fig. 4e

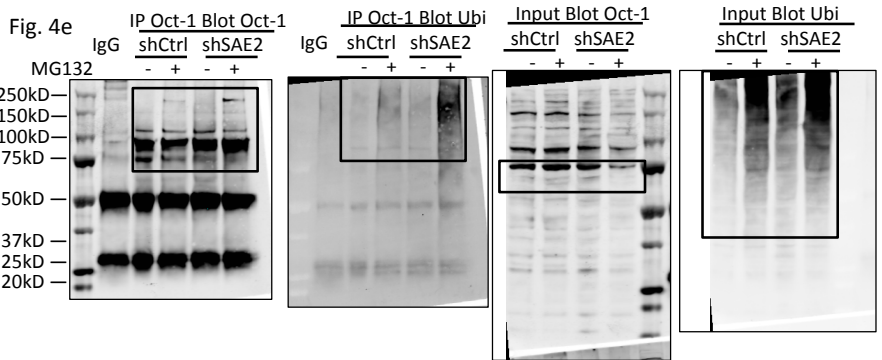

Fig. 4d

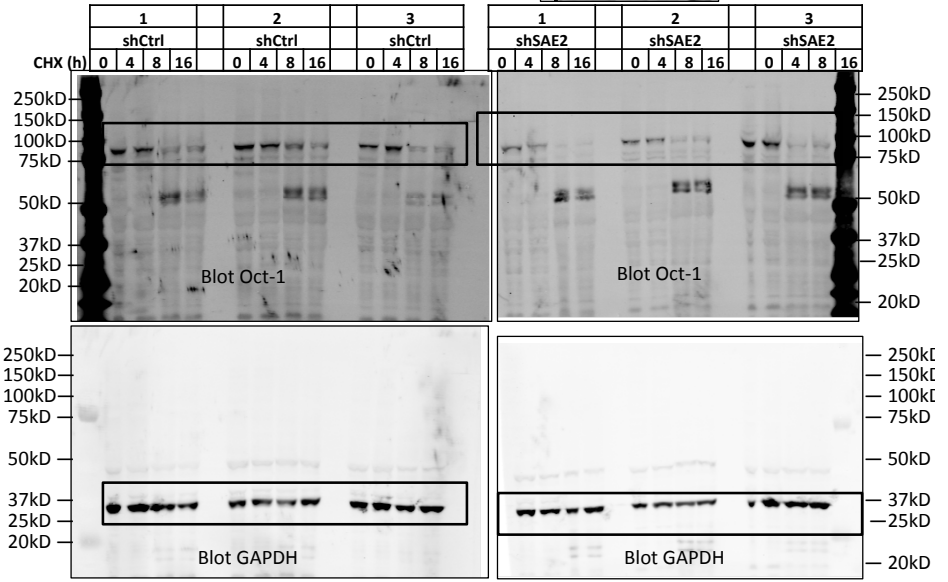

Fig.5b

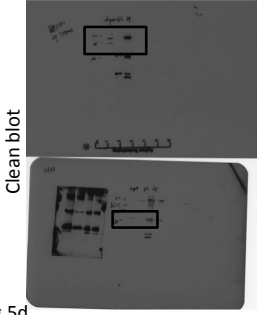

Fig. 5c

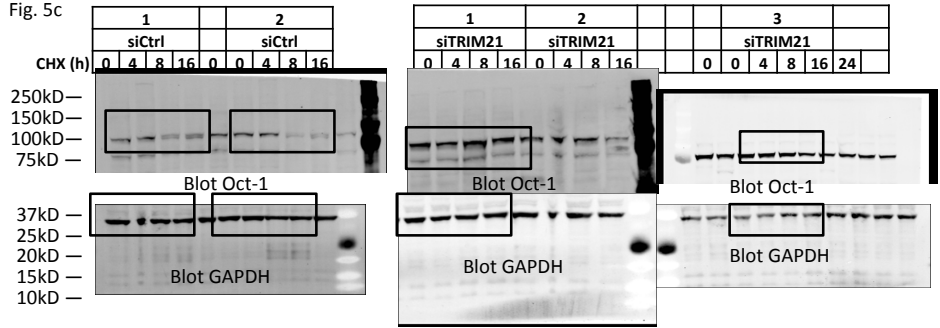

Fig.5d

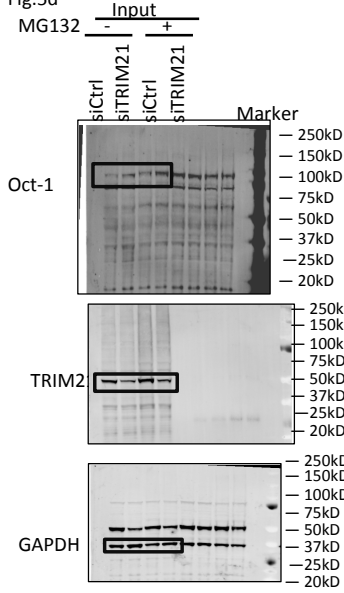

Fig.5e

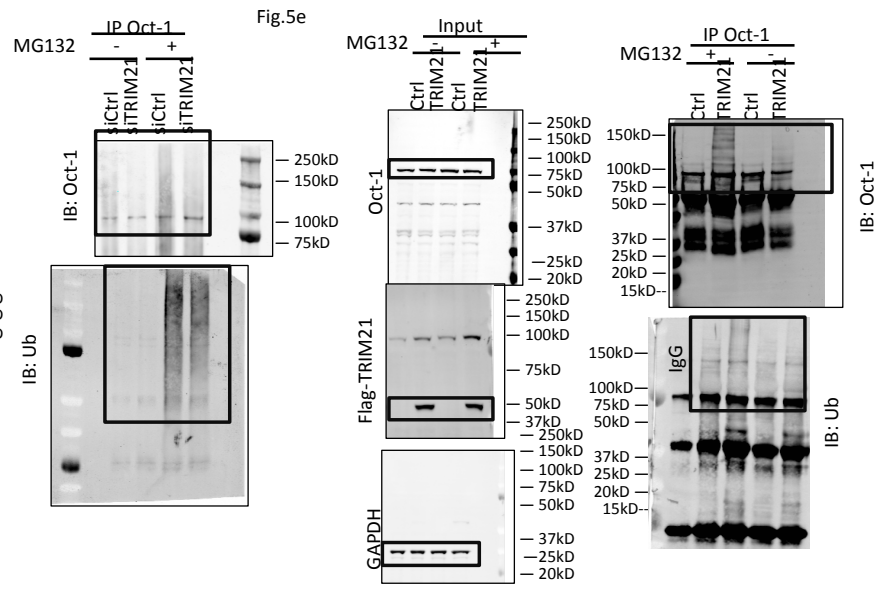

Fig.6b

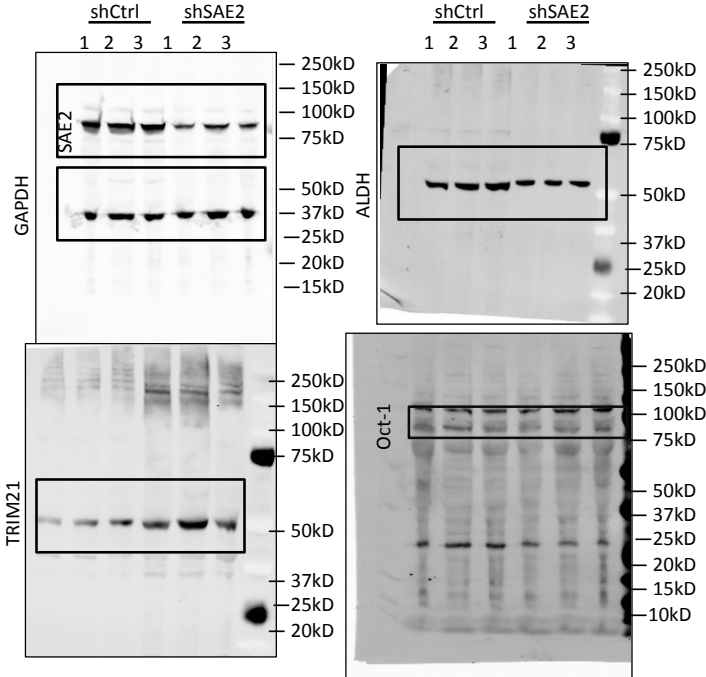

Fig.6f

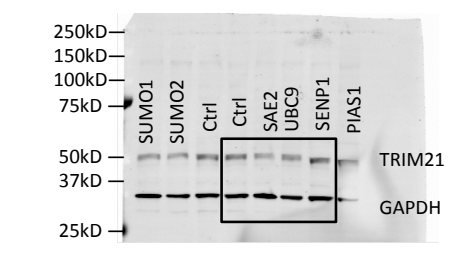

Fig6g

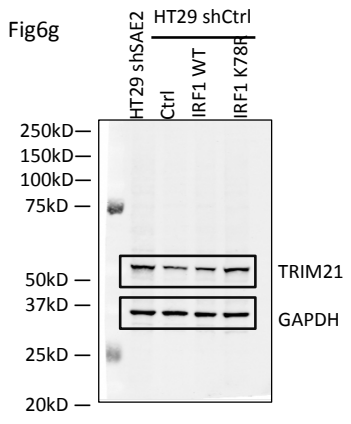

Fig7b

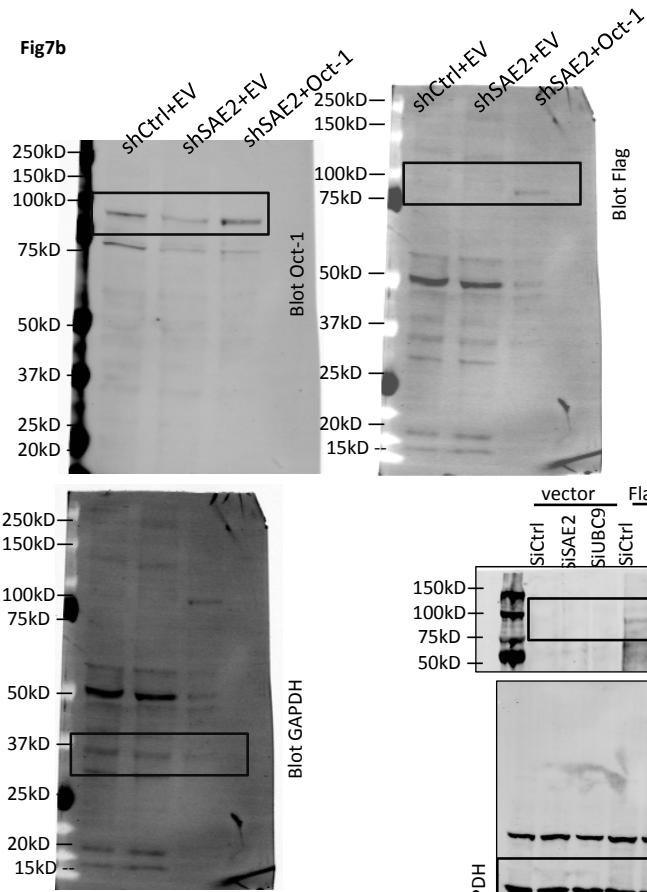

Fig7d

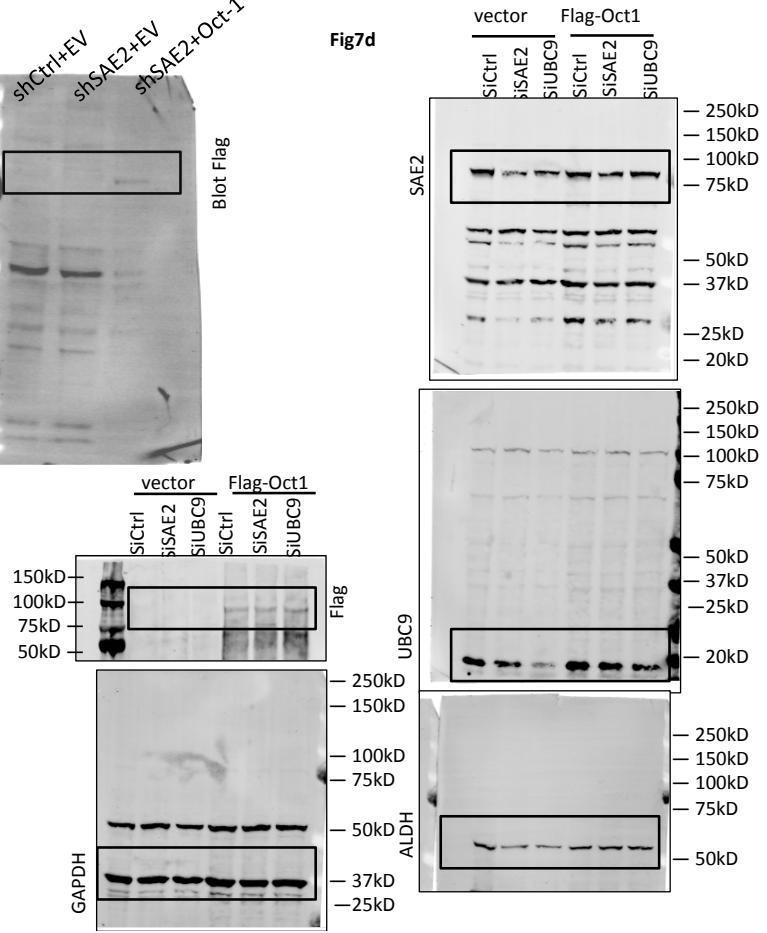

**Supplementary Table 1: mRNA gene expression level of SUMOylation-related genes in colorectal cancer cell lines compared with normal colonic mucosa**

| Gene                        | isoform count | HCT116 (RPKM <sup>1</sup> ) | HT29 (RPKM)   | Average Control (RPKM) | HCT116 vs. Control | HT29 vs. Control |
|-----------------------------|---------------|-----------------------------|---------------|------------------------|--------------------|------------------|
| <b>SAE2 (UBA2)</b>          | <b>1</b>      | <b>60.09</b>                | <b>91.02</b>  | <b>6.13</b>            | <b>9.80</b>        | <b>14.85</b>     |
| <b>SAE1</b>                 | <b>4</b>      | <b>103.75</b>               | <b>108.24</b> | <b>17.34</b>           | <b>5.98</b>        | <b>6.24</b>      |
| SUMO1                       | 3             | 61.64                       | 41.83         | 10.67                  | 5.78               | 3.92             |
| SUMO2                       | 2             | 97.61                       | 80.04         | 20.41                  | 4.78               | 3.92             |
| RANBP2                      | 1             | 12.81                       | 9.85          | 2.79                   | 4.58               | 3.52             |
| SENP3                       | 1             | 21.15                       | 29.76         | 9.15                   | 4.47               | 4.94             |
| PIAS2                       | 2             | 9.36                        | 3.88          | 2.11                   | 4.43               | 1.83             |
| PIAS3                       | 1             | 6.64                        | 7.95          | 1.53                   | 4.34               | 5.20             |
| NSMCE2 (Mms21)              | 1             | 21.78                       | 33.85         | 5.13                   | 4.24               | 6.59             |
| Ubc9 (E2, UBE2I)            | 4             | 113.94                      | 101.28        | 29.31                  | 3.89               | 3.46             |
| SENP2                       | 1             | 11.60                       | 11.82         | 3.18                   | 3.66               | 3.68             |
| PKD2 (Pc2)                  | 1             | 3.16                        | 1.94          | 0.89                   | 3.56               | 2.18             |
| SENP6                       | 2             | 8.96                        | 3.50          | 1.41                   | 3.32               | 2.17             |
| SENP5                       | 1             | 7.41                        | 6.05          | 1.88                   | 3.07               | 2.82             |
| SENP1                       | 1             | 5.93                        | 6.81          | 1.16                   | 2.79               | 2.97             |
| SENP7                       | 2             | 2.28                        | 0.78          | 0.34                   | 1.72               | 0.83             |
| PIAS1                       | 1             | 9.87                        | 17.31         | 6.79                   | 1.45               | 2.55             |
| PIAS4                       | 1             | 5.09                        | 9.23          | 6.52                   | 0.78               | 1.42             |
| SUMO3                       | 1             | 19.74                       | 67.49         | 30.72                  | 0.64               | 2.20             |
| GAPDH                       | 1             | 2100.40                     | 2313.06       | 1094.17                | 1.92               | 2.11             |
| TUBA4A ( $\alpha$ -tubulin) | 1             | 12.05                       | 118.52        | 33.62                  | 0.36               | 3.53             |
| ACTB( $\beta$ -actin)       | 1             | 528.15                      | 1692.28       | 2300.95                | 0.23               | 0.74             |

<sup>1</sup>RPKM = reads per kilobase of exon per million mapped reads



**Supplementary Table 2. Oct1-interacting proteins identified by co-IP and mass spectrometry analysis.**

| Accession     | Protein       | Score <sup>1</sup> | Coverage <sup>2</sup> | MW [kDa]    |
|---------------|---------------|--------------------|-----------------------|-------------|
| B4DY30        | PRMT5         | 57.62              | 18.72                 | 67.6        |
| B4E0B3        | Histone H2A   | 39.21              | 17.12                 | 12.1        |
| P11142        | HSP70         | 36.82              | 12.69                 | 70.9        |
| B4DNE0        | EF1a          | 34.95              | 15.19                 | 42.6        |
| Q8WU19        | TUBULIN       | 33.99              | 15.22                 | 37.2        |
| 14249924      | XRCC6         | 28.05              | 11.82                 | 69.8        |
| P11021        | GRP78         | 25.12              | 4.28                  | 72.3        |
| Q45KI0        | Trypsin I     | 21.80              | 11.90                 | 9.2         |
| P07900        | HSP90         | 20.91              | 7.51                  | 84.6        |
| <b>P19474</b> | <b>TRIM21</b> | <b>19.87</b>       | <b>5.47</b>           | <b>54.1</b> |
| Q59GP5        | eEF1a2        | 18.71              | 14.12                 | 36.9        |
| Q5T8M8        | ACTIN         | 13.93              | 11.50                 | 32.0        |
| Q969I0        | KRT8          | 13.86              | 11.78                 | 41.1        |
| Q6AI40        | DKFZ          | 13.51              | 29.85                 | 7.2         |
| Q6P3W7        | SCYL2         | 11.71              | 3.12                  | 103.6       |
| 10863945      | XRCC5         | 11.63              | 3.14                  | 82.7        |
| Q5T6W2        | HNRNPK        | 11.29              | 11.87                 | 41.8        |
| B2R4V4        | BANF1         | 9.35               | 15.73                 | 10.0        |
| Q5JUV3        | NT5C2         | 8.61               | 7.47                  | 20.4        |
| B0QYB2        | KCTD17        | 7.23               | 20.63                 | 7.0         |
| Q0QEN7        | ATP5B         | 7.09               | 3.15                  | 48.1        |
| E9PCY7        | HNRNPH1       | 6.75               | 6.53                  | 47.1        |
| 1698399       | BRCA1         | 6.25               | 2.42                  | 207.6       |
| Q96BA7        | HNRPU         | 6.16               | 3.05                  | 79.7        |
| Q96HS1        | PGAM5         | 6.14               | 4.15                  | 32.0        |
| Q96IR1        | RPS4X         | 5.56               | 6.58                  | 27.2        |
| C9J5S7        | PPIA          | 5.16               | 11.57                 | 13.2        |
| Q96CJ1        | EAF2          | 4.71               | 13.08                 | 28.8        |
| Q8WUW7        | PKM2          | 4.32               | 4.96                  | 37.3        |
| 331284178     | NCOR2         | 4.12               | 1.03                  | 273.5       |
| P78333        | GPC5          | 3.84               | 2.27                  | 63.7        |
| Q9NZ81        | PRR13         | 3.74               | 22.30                 | 15.4        |
| Q99714        | HSD17B10      | 3.66               | 7.66                  | 26.9        |
| C9JYQ9        | RPL22L1       | 3.55               | 10.74                 | 14.5        |
| P39019        | RPS19         | 3.48               | 8.97                  | 16.1        |
| C9J4Z3        | RPL37A        | 3.36               | 26.47                 | 7.6         |
| Q76N53        | RPL31         | 3.00               | 29.79                 | 5.6         |
| P16422        | EPCAM         | 2.95               | 5.10                  | 34.9        |
| E5RH77        | RPS14         | 2.83               | 11.19                 | 14.3        |
| Q5T0P8        | RPS24         | 2.63               | 11.54                 | 15.1        |
| 119623829     | TNF2          | 2.41               | 7.73                  | 25.6        |
| 85681283      | FDXR          | 2.31               | 2.44                  | 53.8        |
| 78070398      | ATF2          | 2.07               | 3.58                  | 48.0        |
| 21618340      | STAT3         | 2.06               | 1.17                  | 88.0        |

<sup>1</sup> Score – the sum of the scores of the individual peptides

<sup>2</sup> Coverage – the percentage of the protein sequence covered by identified peptides

Blue-labeled proteins have been identified as Oct-1 interacting proteins in previous studies.

Red-labeled protein TRIM21, ubiquitin E3 ligase.
